# Supplementary material for: Rif1 regulates telomere length through conserved HEAT repeats
Source: PubMed Central journal article supplement (PMC8053089; doi:10.1093/nar/gkab206), 2021-03-27
Supplement: gkab206_supplemental_file.pdf [file gkab206_supplemental_file.pdf]

## Figure Legends for Supplementary Figures

### **Supplementary Figure S1: *N-terminal NLS is important in full length Rif1***

A. Western blot showing Rif1 (anti-FLAG antibody) and Pgk1 (anti-Pgk1 antibody, control) protein levels of indicated strains. B. Southern blot hybridized with a Y' probe to visualize "bulk" XhoI restriction fragments of indicated strains (See Materials and Methods).

### **Supplementary Figure S2: *Structure-based sequence alignment***

A. Workflow of structure-based sequence alignment (see Materials and Methods). B. Phylogenetic tree of the Multiple Sequence Alignment (MSA) generated using ConSurf. C. Conservation graph generated using GraphPad Prism of sequence alignment with position in Rif1 protein on the X-axis. The height of the bar indicates ConSurf Grade, with a higher bar having higher conservation. Purple indicates high conservation, and green indicates low conservation. Rif1 domain map is depicted to scale above the bar graph, with the newly defined NLS added, and Rif1 aa 177-196 are depicted with a blue dotted line (RBM: Rap1 binding motif; CTD: Carboxyl-terminal domain; Dbf4 binding overlaps CTD). D. MSA mapped onto the Rif1 crystal structure (PDB: 5NW5, showing one Rif1 monomer and DNA) visualized using PyMOL. Purple indicates high conservation, and green indicates low conservation.

### **Supplementary Figure S3: *Protein levels for strains mutated in conserved HEAT repeats***

A. Western blot showing Rif1 (anti-FLAG antibody) and Pgk1 (anti-Pgk1 antibody, control) protein levels of indicated strains, related to Figure 6A,B. B. Western blot showing Rif1 (anti-FLAG antibody) and Pgk1 (anti-Pgk1 antibody, control) protein levels of indicated strains, related to Figure 6F,G. C. Conserved residues with corresponding distance from lysine cluster and 1L telomere length, related to Figure 6A. D. Western blot showing Rif1 (anti-FLAG antibody) and Pgk1 (anti-Pgk1 antibody, control) protein levels of indicated strains.

### **Supplementary Figure S4: *Mutation of Rif1 palmitoylation sites does not affect telomere length***

A. Western blot showing Rif1 (anti-FLAG antibody) and Pgc1 (anti-Pgc1 antibody, control) protein levels of indicated strains. B. Southern blot hybridized with a Y' probe to show bulk telomeres for the indicated strains (See Materials and Methods).

# Supplementary Figure S1

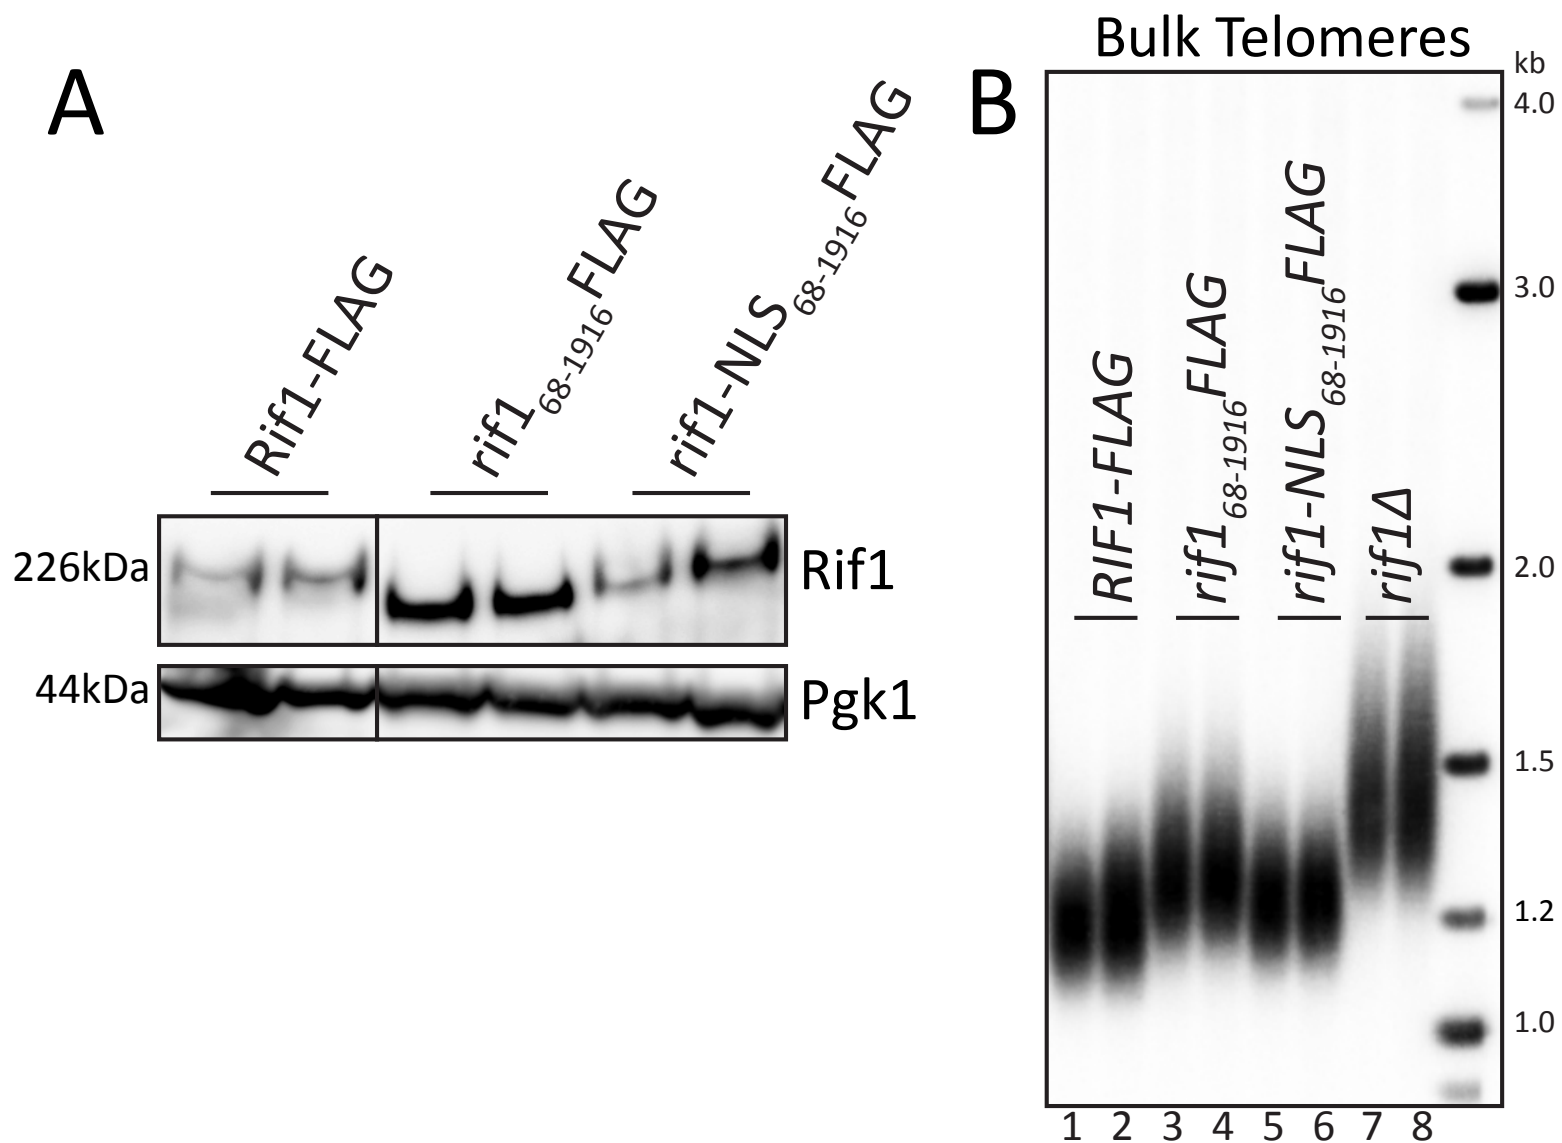

# Supplementary Figure S2

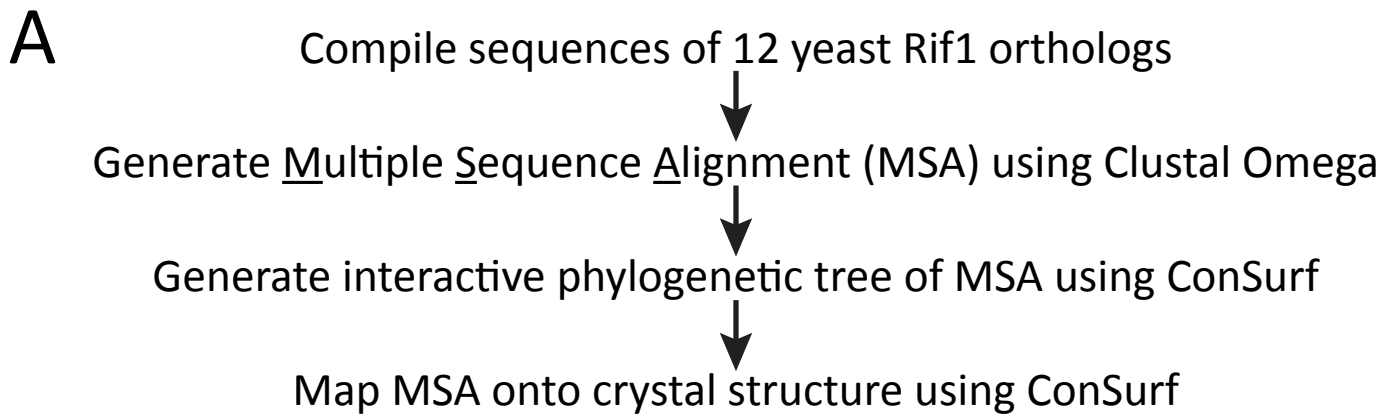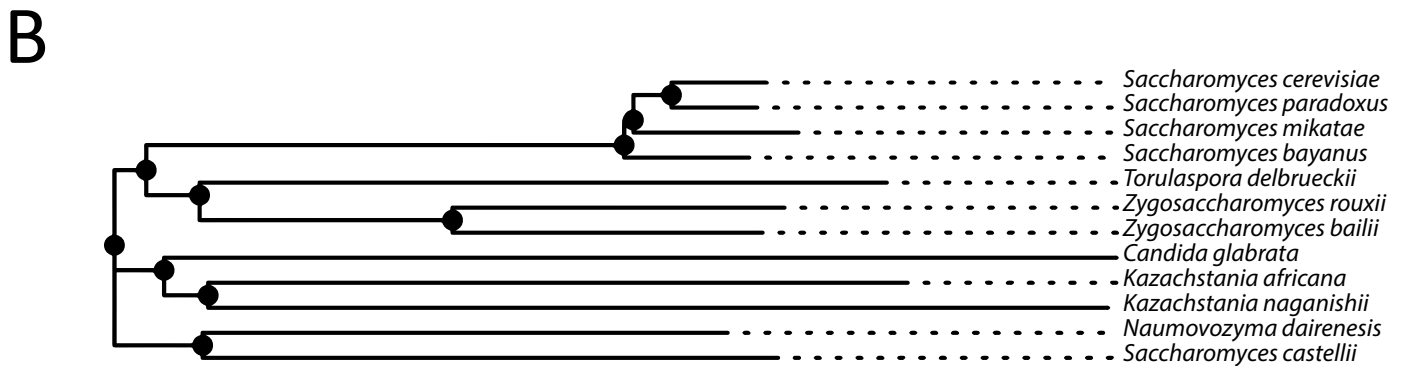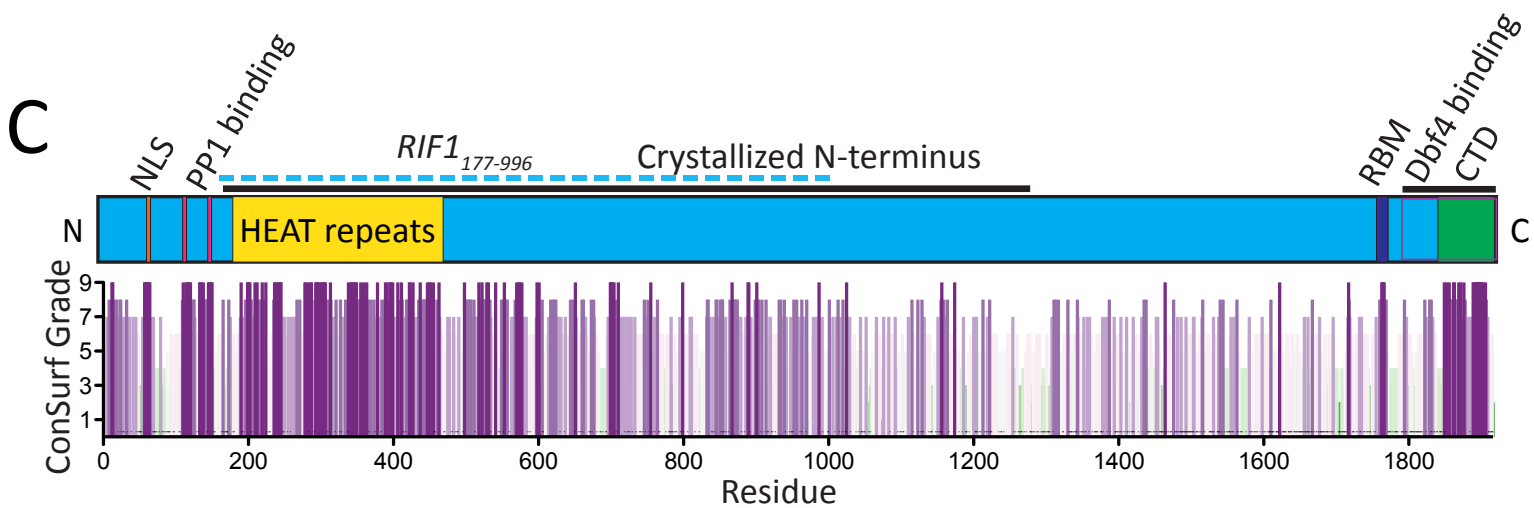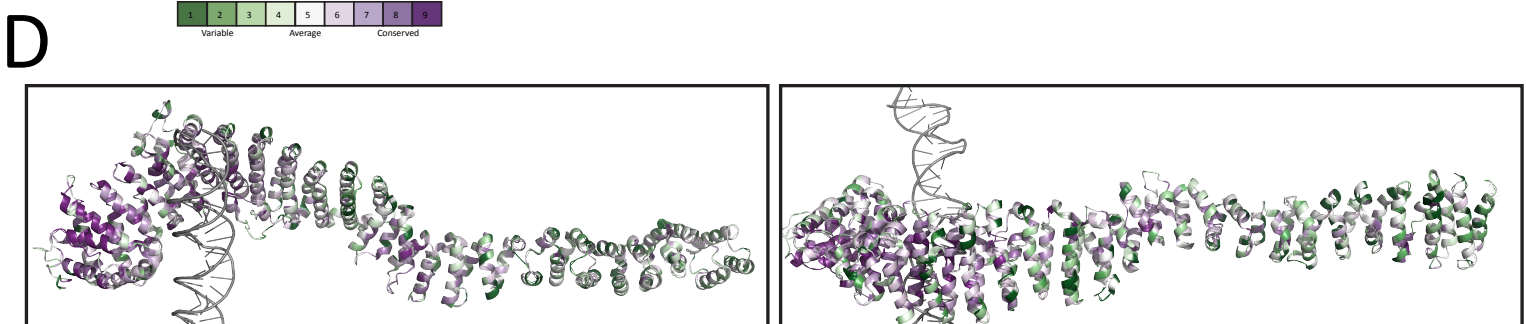



# Supplementary Figure S3

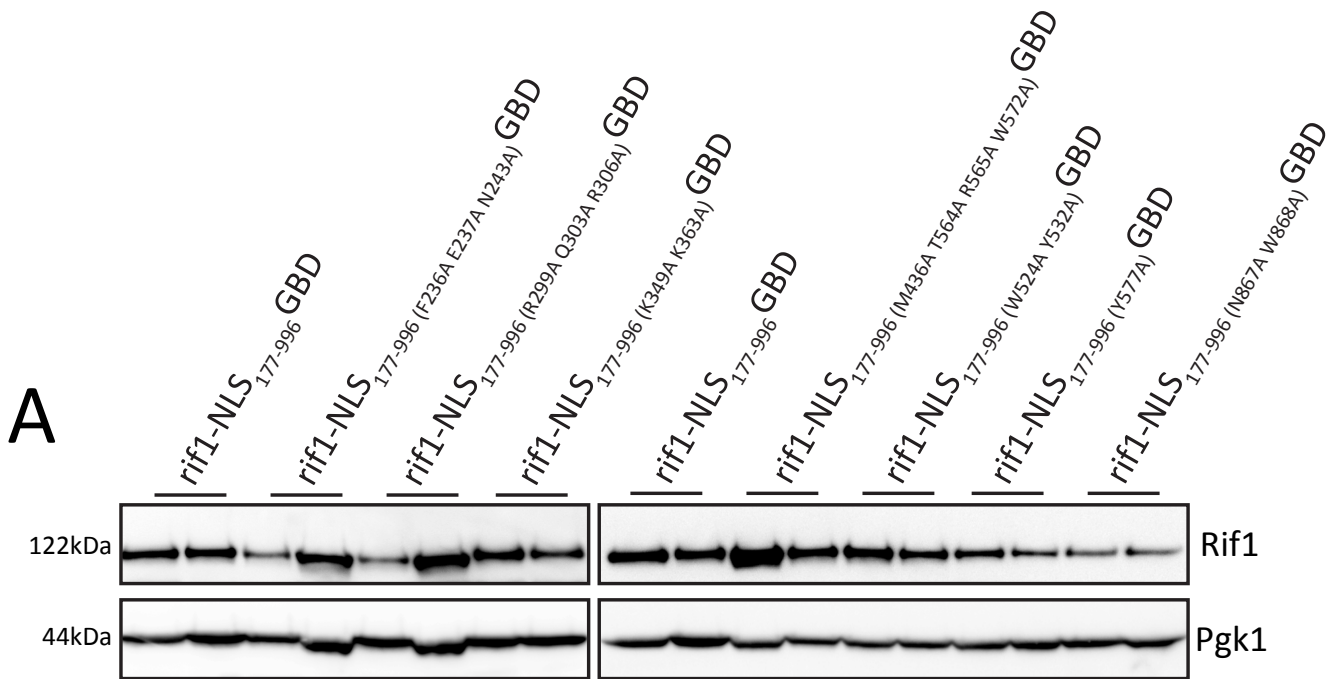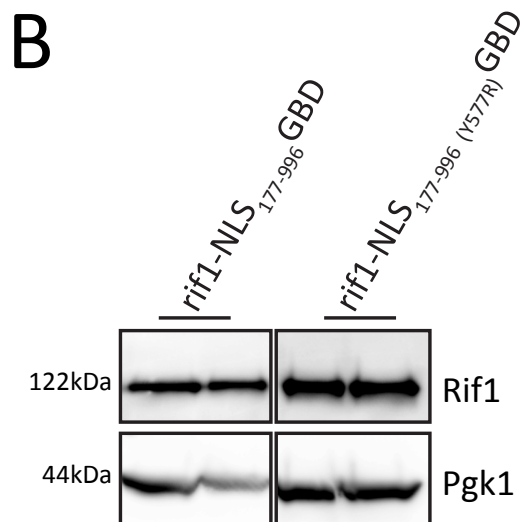

**C**

| Residues Interrogated    | Distance from Lysine cluster | 1L Telomere length |
|--------------------------|------------------------------|--------------------|
| F236A E237A N243A        | 194                          | Wild type          |
| R299A Q303A R306A        | 131                          | Wild type          |
| K349A K363A              | 74                           | Wild type          |
| M436A T564A R565A W572A  | 0                            | Long               |
| <b>K437A K563A K570A</b> | <b>0</b>                     | <b>Long</b>        |
| W524A Y532A              | 0                            | Long               |
| Y577A                    | 7                            | Long               |
| N867A W868A              | 297                          | Wild type          |

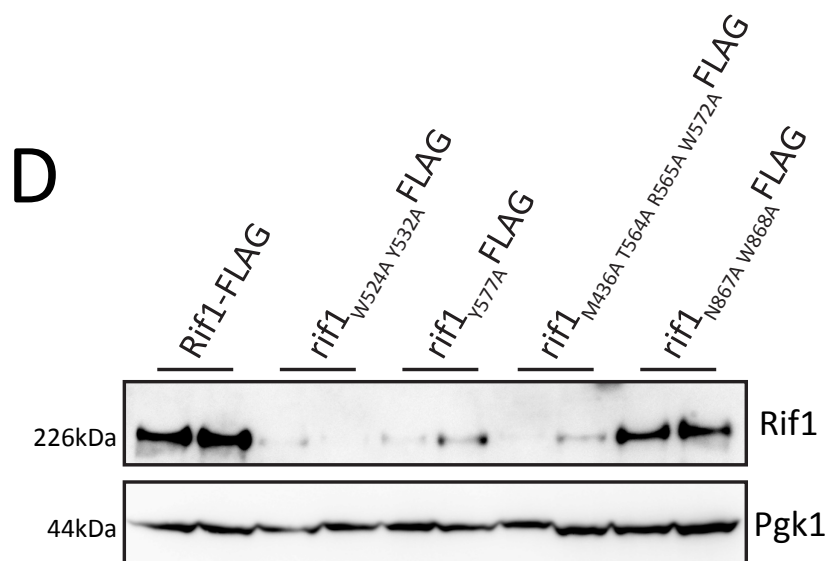

# Supplementary Figure S4

## A

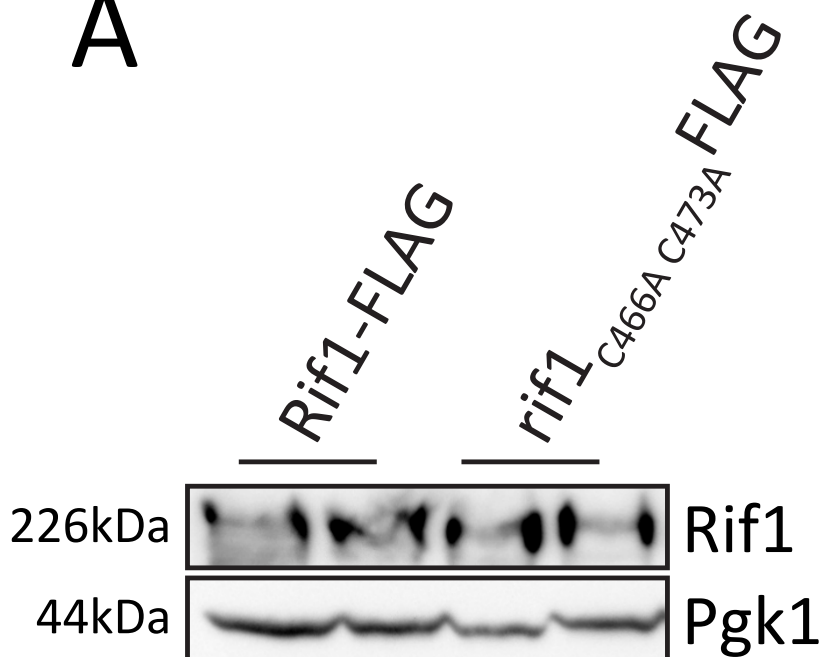

## B

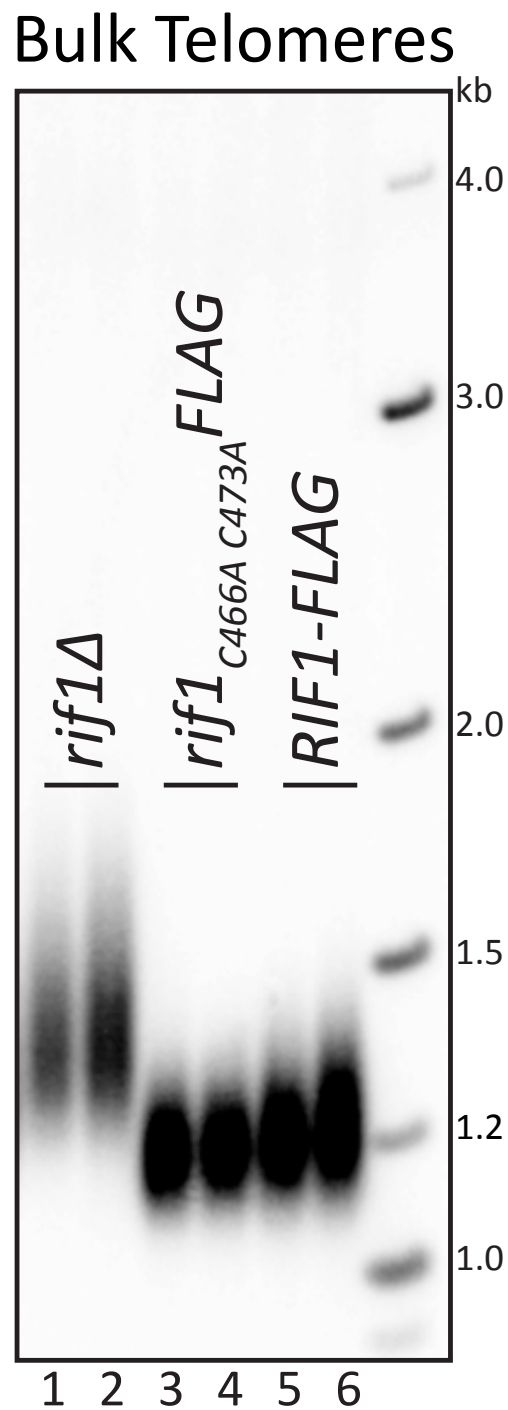

**Figure Legend for Supplementary Table**

**Supplementary Table 1: *Strain list, plasmid list, and cloning specifics and reagents***

## Supplementary Table 1

| Strain ID    | Genotype                                                                | Source                                                                                | Construct for cloning | Primer 1       | Primer 2 | Additional information                                      |
|--------------|-------------------------------------------------------------------------|---------------------------------------------------------------------------------------|-----------------------|----------------|----------|-------------------------------------------------------------|
| SSy161       | MATa ade2-1 ura3-1 his3-11,15 trp1-1 leu2-3,112 can1-100 bar1::hisG     | N/A                                                                                   |                       |                |          |                                                             |
| CVy61        | SSy161 + TRP1::BrdU- <i>inc</i>                                         | <a href="https://doi.org/10.1002/yea.1406">https://doi.org/10.1002/yea.1406</a>       |                       |                |          |                                                             |
| CALy11       | CVy61 + rif1Δ::kanmx                                                    | <a href="https://doi.org/10.7554/eLife.58066">https://doi.org/10.7554/eLife.58066</a> |                       |                |          |                                                             |
| CALy320      | CALy117 + rif11-1322-6xFLAG-KANMX                                       | This study                                                                            | pAS35                 | AS101          | CS201    | Extend homology by PCR with CS315, AS100                    |
| JHUy783      | tel1Δ::HYGR                                                             | Greider Lab                                                                           |                       |                |          |                                                             |
| CALy117, 118 | CVy61 + 1L 5XUAS landing pad                                            | This study                                                                            | pCS33                 | CS155          | CS218    | Digest PCR product I-Sce1 DpnI                              |
| CALy202, 203 | CALy117 + rif1Δ::KANMX                                                  | This study                                                                            | gDNA (CALy11)         | OCC23          | OCC84    |                                                             |
| CALy286, 287 | CALy117 + rif11-1322GBD-6xFLAG-KANMX                                    | This study                                                                            | pCS172                | RW432          | OCC84    |                                                             |
| CALy290, 291 | CALy117 + rif11-1322(K437E K563E K570E) GBD-6xFLAG-KANMX                | This study                                                                            | pCS171                | RW428          | OCC84    |                                                             |
| CALy328, 329 | CALy117 + rif11-1322-6xFLAG-KANMX                                       | This study                                                                            | gDNA (CALy320)        | RW431          | CS323    |                                                             |
| CALy375, 376 | CALy117 + rif1177-1322GBD-6xFLAG-KANMX                                  | This study                                                                            | pCS184                | OCC23          | OCC84    |                                                             |
| CALy408, 409 | CALy117 + rif1-cmycNLS177-1322GBD-6xFLAG-KANMX                          | This study                                                                            | pCS189                | OCC23          | OCC84    |                                                             |
| CALy428, 429 | CALy117 + rif1-996GBD-6xFLAG-KANMX                                      | This study                                                                            | pCS193                | RW430          | CS323    |                                                             |
| CALy432, 439 | CALy117 + rif1-cmycNLS177-996GBD-6xFLAG-KANMX                           | This study                                                                            | pCS193                | OCC23          | CS323    |                                                             |
| CALy442, 443 | CALy117 + RIF1-6xFLAG-KANMX                                             | This study                                                                            | pCS177                | AS100          | CS383    |                                                             |
| CALy454, 455 | CALy117 + rif1-cmycNLS177-996 (K437E K563E K570E)GBD-6xFLAG-KANMX       | This study                                                                            | pCS195                | OCC23          | OCC84    |                                                             |
| CALy460, 461 | CALy117 + rif1-cmycNLS177-996 (M436A T564A R565A W572A)GBD-6xFLAG-KANMX | This study                                                                            | pCS198                | OCC23          | OCC84    |                                                             |
| CALy462, 463 | CALy117 + rif1-cmycNLS177-996 (K437R K563R K570R)GBD-6xFLAG-KANMX       | This study                                                                            | pCS196                | OCC23          | OCC84    |                                                             |
| CALy465, 465 | CALy117 + rif1-cmycNLS177-996 (T504E S584E T775E S824E)GBD-6xFLAG-KANMX | This study                                                                            | pCS210                | OCC23          | OCC84    |                                                             |
| CALy472, 473 | CALy117 + tel1Δ::HYGR                                                   | This study                                                                            | gDNA (JHUy783)        | OCC25          | OCC80    |                                                             |
| CALy478, 479 | CALy117 + rif1-cmycNLS177-996 (T504A S584A T775A S824A)GBD-6xFLAG-KANMX | This study                                                                            | pCS209                | OCC23          | OCC84    |                                                             |
| CALy480, 481 | CALy117 + rif1-cmycNLS177-996 (K349A K363A)GBD-6xFLAG-KANMX             | This study                                                                            | pCS207                | OCC23          | OCC84    |                                                             |
| CALy486, 487 | CALy472 + rif1-cmycNLS177-996GBD-6xFLAG-KANMX                           | This study                                                                            | pCS193                | OCC23          | CS323    |                                                             |
| CALy488, 489 | CALy472 + rif1-cmycNLS177-996 (T504A S584A T775A S824A)GBD-6xFLAG-KANMX | This study                                                                            | pCS209                | OCC23          | OCC84    |                                                             |
| CALy490, 491 | CALy472 + rif1-cmycNLS177-996 (T504E S584E T775E S824E)GBD-6xFLAG-KANMX | This study                                                                            | pCS210                | OCC23          | OCC84    |                                                             |
| CALy498, 499 | CALy117 + rif1-cmycNLS177-996 (N867A W868A)GBD-6xFLAG-KANMX             | This study                                                                            | pCS211                | OCC23          | OCC84    |                                                             |
| CALy503, 539 | CALy117 + rif1-cmycNLS177-996 (F236A E237A N243A)GBD-6xFLAG-KANMX       | This study                                                                            | pCS214                | OCC23          | OCC84    |                                                             |
| CALy505, 546 | CALy117 + rif1-cmycNLS177-996 (R299A Q303A R306A)GBD-6xFLAG-KANMX       | This study                                                                            | pCS215                | OCC23          | OCC84    |                                                             |
| CALy506, 507 | CALy117 + rif1-cmycNLS177-996 (W524A Y532A)GBD-6xFLAG-KANMX             | This study                                                                            | pCS216                | OCC23          | OCC84    |                                                             |
| CALy508, 509 | CALy117 + rif1-cmycNLS177-996 (Y577A)GBD-6xFLAG-KANMX                   | This study                                                                            | pCS217                | OCC23          | OCC84    |                                                             |
| CALy520, 521 | CALy117 + rif1-cmycNLS177-996 (K437A K563A K570A) GBD-6xFLAG-KANMX      | This study                                                                            | pCS222                | OCC23          | OCC84    |                                                             |
| CALy530, 531 | CALy117 + rif1-cmycNLS177-996 (Y577R)GBD-6xFLAG-KANMX                   | This study                                                                            | pCS230                | OCC23          | OCC84    |                                                             |
| CALy532,533  | CALy117 + rif1-68-1916-6xFLAG-KANMX                                     | This study                                                                            | pCS227                | Kpn1           | NotI     | Digested plasmid, gel extracted top band for transformation |
| CALy534,535  | CALy117 + rif1-cmyc-68-1916-6xFLAG-KANMX                                | This study                                                                            | pCS226                | Kpn1           | NotI     | Digested plasmid, gel extracted top band for transformation |
| CALy547,548  | CALy117 + rif1-W524A Y532A-6xFLAG-KANMX                                 | This study                                                                            | pCS234                | RW428          | CS323    |                                                             |
| CALy549,550  | CALy117 + rif1-Y577A-6xFLAG-KANMX                                       | This study                                                                            | pCS233                | RW428 or CS509 | CS323    |                                                             |
| CALy551,552  | CALy117 + rif1-M436A T564A R565A W572A-6xFLAG-KANMX                     | This study                                                                            | pCS235                | RW428          | CS323    |                                                             |
| CALy553,554  | CALy117 + rif1-C466A C473A-6xFLAG-KANMX                                 | This study                                                                            | pCS237                | RW428          | CS323    |                                                             |
| CALy557,558  | CALy117 + rif1-N867A W868A-6xFLAG-KANMX                                 | This study                                                                            | pCS239                | RW429          | CS323    |                                                             |

### Figure 1

CALy117, 118  
CALy202, 203  
CALy328, 329  
CALy286, 287  
CALy442, 443

### Figure 2

CALy117, 118  
CALy202, 203  
CALy328, 329  
CALy286, 287  
CALy375, 376  
CALy408, 409

### Figure 3

CALy117, 118  
CALy328, 329  
CALy286, 287  
CALy408, 409  
CALy428, 429  
CALy432, 439  
CALy202, 203

### Figure 4

CALy117, 118  
CALy328, 329  
CALy202, 203  
CALy472, 473  
CALy432, 439  
CALy486, 487  
CALy478, 479  
CALy488, 489  
CALy465, 465  
CALy490, 491

### Figure 5

CALy117, 118  
CALy328, 329  
CALy286, 287  
CALy290, 291  
CALy432, 439  
CALy454, 455  
CALy462, 463  
CALy520, 521

### Figure 6

CALy117, 118  
CALy503, 539  
CALy505, 546  
CALy480, 481  
CALy460, 461  
CALy506, 507  
CALy508, 509  
CALy498, 499  
CALy432, 439  
CALy530, 531

### Supplementary Figure S1

CALy442, 443  
CALy532,533  
CALy534,535  
CALy202, 203

### Supplementary Figure S3

CALy117, 118  
CALy503, 539  
CALy505, 546  
CALy480, 481  
CALy460, 461  
CALy506, 507  
CALy508, 509  
CALy498, 499  
CALy432, 439  
CALy530, 531  
CALy442,443  
CALy547,548  
CALy549,550  
CALy551,552  
CALy557,558

### Supplementary Figure S4

CALy442, 443  
CALy553,554  
CALy202, 203



## 1L TELOMERE PROBE FOR SOUTHERN- PCR from pCS206

|       |                       |            |
|-------|-----------------------|------------|
| CS414 | ATCACCAGCAACATGTTTGG  | This study |
| CS432 | GCAAATTAAAGCCTTCGAGCG | This study |

## Y' PROBE FOR SOUTHERN- PCR from gDNA

|           |                                  |                                                                                               |
|-----------|----------------------------------|-----------------------------------------------------------------------------------------------|
| YPrimeFWD | CGCGAATTGCCCCTACAGCACTTCTACATAGC | <a href="https://doi.org/10.1534/genetics.115.177899">doi.org/10.1534/genetics.115.177899</a> |
| YPrimeREV | CGAGAATTCCAGCGTTTGCGTTCCATGACG   | <a href="https://doi.org/10.1534/genetics.115.177899">doi.org/10.1534/genetics.115.177899</a> |

## YEAST MEDIA SUPPLEMENTS

|                    |                          |                     |
|--------------------|--------------------------|---------------------|
| NAM (Nicotinamide) | 5mM final to plates      | Sigma: 72340-100G   |
| G418 (Geneticin)   | 200µg/ml final to plates | Life Tech: 11811031 |
| Hygromycin         | 200µg/ml final to plates | Corning: 30-240-CR  |

## Figure Legend for Supplementary File

### **Supplementary File 1: *Multiple Sequence Alignment (MSA) of Rif1***

MSA of Rif1 generated as described in Materials and Methods and visualized using SnapGene software.



Consensus

- 1. Saccharomyces\_cerevisiae
- 2. Kazachstania\_naganishii
- 3. Candida\_glabrata
- 4. Saccharomyces\_castellii
- 5. Naumovozyma\_dairenensis
- 6. Kazachstania\_africana
- 7. Torulaspora\_delbrueckii
- 8. Saccharomyces\_mikatae
- 9. Saccharomyces\_bayanus
- 0. Saccharomyces\_paradoxus
- 1. Zygoaccharomyces\_bailii
- 2. Zygosaccharomyces\_rouxii

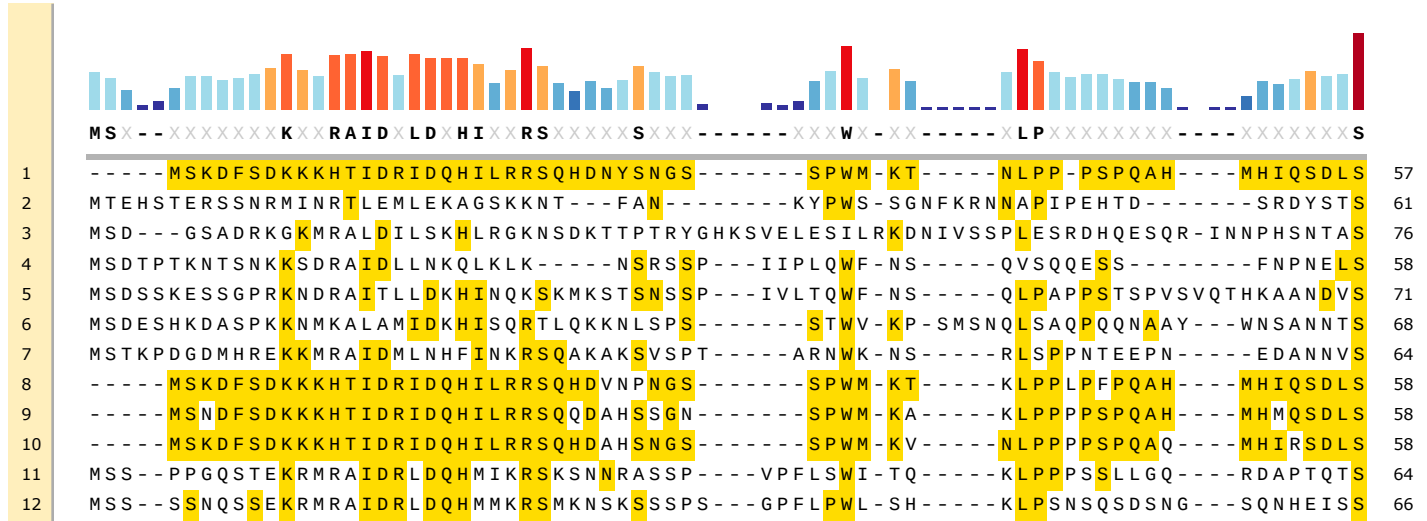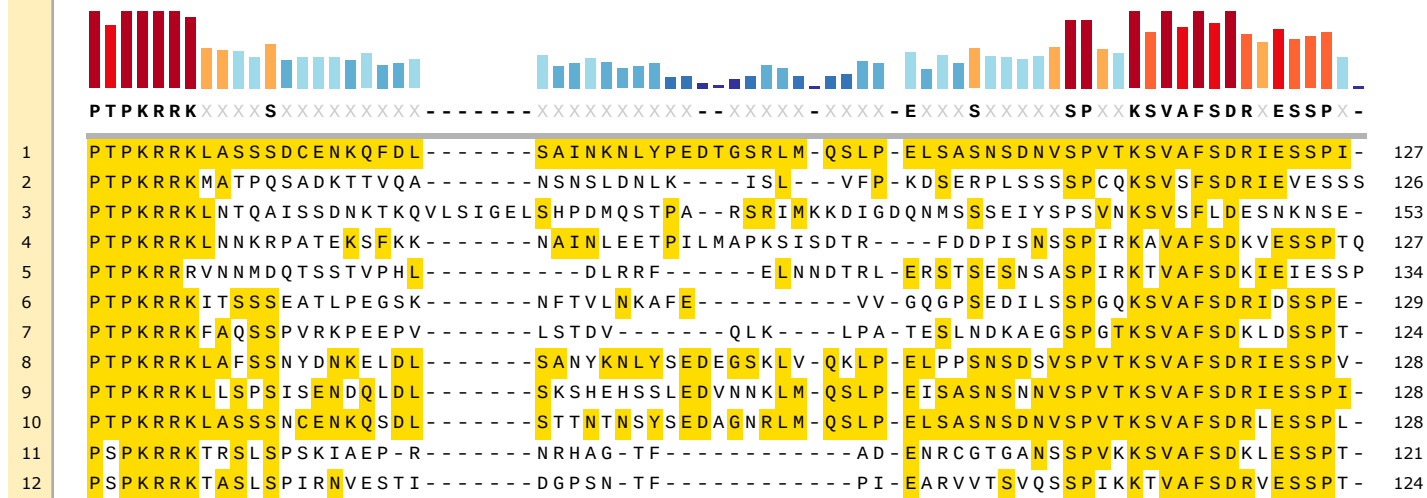

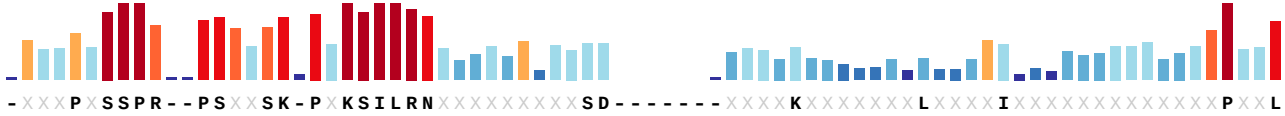

|    |                                                                                 |     |
|----|---------------------------------------------------------------------------------|-----|
| 1  | -YRIPGSSPK--PSPSSK-PGKSILRNRLPSVR-TVSD-----LSYNKLQYTQHKLHNGNIFT-SPYKET-RVNPRAL  | 193 |
| 2  | AQTNSAASPR--PSSTSKLRSPKILKLNRYSLQKGDIV-----TE-----Q-----RL--TFSARTTFSLNPMEL     | 182 |
| 3  | -STSSNSSPR--HSPTS-KPKSILRNSSSPEHNKQRM-----NDKYGKPIAANV-----HL-SRSENHSKNQYSPDNL  | 217 |
| 4  | QSPMPDSSPRRPSSATKPPGKSILRNPDFITNRTKSD-----LSSNKDK--LVDSMSPLQLDPGNI              | 187 |
| 5  | TQTLPESSPRHPPSSDRKPPSKSILRNSTPSSPVKYNTIKASSDVTYSKTVS--NNLAASNA--GVATNDFLHADPRKV | 210 |
| 6  | -RITAKSSPT--PSSTSKPPVKSILRNPGATQD-TDEE-----LNHEKSQR-----DSI--VPIDNDSSETNPNNI    | 189 |
| 7  | -QRTMNSSPR--QTPASA-PSKSILRNPIEFQK-NVSL-----MADP-AGKPKSKLA-GR-G-GQVNDTSDDDIDPTSL | 188 |
| 8  | -HHVPGSSPK--PSPSSR-PGKSILRNKMSSAR-TVSD-----LSYNKLQHPEHRLHNGNILT-SPYKETIVINPRTL  | 195 |
| 9  | -HHVPGSSPK--PSPSSK-PGKSILRNRMPPMR-TVSD-----LSYNKLQHSQQLHNGNIFT-SPYKESTGVDPRTL   | 195 |
| 10 | -HHVPGSSPK--PSPSSK-PGKSILRNRMPSVR-TVSD-----LSYNKLQYTQHKLHNGNIFT-SPYKETIGLNPHSL  | 195 |
| 11 | -QKSPRSSPR--PTSVSK-PSKSILRNADTFRKSTGD-----LTAKRSEMLT----SHIGSARLENNTSPTDPHSL    | 186 |
| 12 | -QQTPRSSPR--PSSLQK-PVKSILRNT-DALRKCVD-----ISFKRPPFLNQ-----NIDR-NKTDRTAGIDPHRL   | 186 |

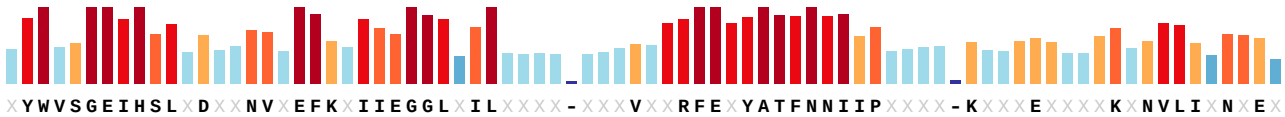

|    |                                                                                   |     |
|----|-----------------------------------------------------------------------------------|-----|
| 1  | EYWVSGEIHGLVDNESVSEFKEIEGGLGILRQES-EDYVARRFEVYATFNNIIPILTT-KNVNEVD-QKFNILIVNIES   | 270 |
| 2  | AYWRSGEIHNMTDIKNINELKNIFEGGLSLLAVSE-PEHVSKRFEIYATFNAILERQFGDNTPTGMEDKVCVSLCAHME   | 261 |
| 3  | QFWNGEIHSLSSNNSVAEFKFLGALKILMQSKNPEYGAKKFEVHATINNIMPSFSS-TTNSQFIEKAAHIVKDNLKI     | 296 |
| 4  | EYWVSGEIHSLFNNENVKEFEFEGIIIGGIHILQLENVENSSNRRFEIYATFNNIIPILPTDKDIDPITENKVKVIVNLP  | 267 |
| 5  | EYWADGEIHSLLYPNNIKEFRDIEGGISFLNM-----GLKKFEIFATFNNIIPINPFGMATDVIDKKIGIIVENLDN     | 284 |
| 6  | SYWTGGEIHSKLDHNNLAEFKQVIEGGLYVLLSSNS-DPHNSRRFEIYATFNNLCRGLSASDHVSETNEKKINILFQKLET | 268 |
| 7  | AFWEFGEVHKMLDSSNFKEFKQIEGGLEILANNE-RSHVARRFEVYASFNNIIPPNNL-KYHSELIEKKFDILIHNLKK   | 266 |
| 8  | NYWVSGEIHGLIDNESISEFKEIEGGLNILRKES-EYVAKRFEVYATFNNIIPILTT-KNVNEVD-QKFNVLIVNIEA    | 272 |
| 9  | DYWVSGEIHSLIDNESVSEFKDIEGGLGILRQES-EYVARRFEVYATFNNIIPILTT-KNVNEVD-QKFNVLIVNVET    | 272 |
| 10 | NYWVSGEIHSLIDNESVSEFKEIEGGLGILRQES-EYVARKFEVYATFNNIIPILTT-KNVNEVD-QKFNVLIVNIES    | 272 |
| 11 | DYWVSGEVHSMLEFNNVHEFKNIEGGLKILSQTD-AVSITKRFEIYATFNNIMPVISG-KGSSEIAERKINVLIDHMDI   | 264 |
| 12 | DFWVGGEVHSMLEDPYNVHEFFNIIDGGLRILSEKT-DECVVKRFEIYATFNNIMPSSST-KGLNDINERKVNVLIDQMEF | 264 |

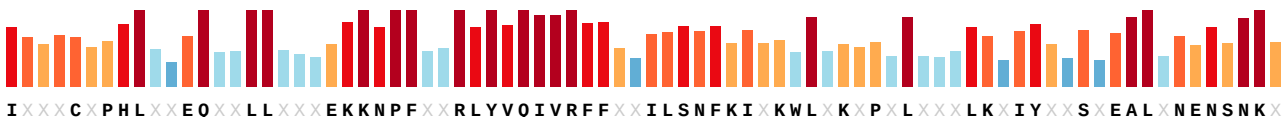

|    |                                                                                  |     |
|----|----------------------------------------------------------------------------------|-----|
| 1  | IIEICIPHLQIAQDTLSSSEKKNPFVIRLYVQIVRFFSAIMSNFKIVKWLTKRPDLVNKLKVIYRWTTGALRNENSXKI  | 350 |
| 2  | IVNVCPHLKLEQSSLEENVSVKNPFSTRLYIQIVRFFTHLLSNFKVICALSSKRNIQTSMKQVFESSYEALSSPHCNKQ  | 341 |
| 3  | IANISIEHLRDEQMSLLQDKKKNPFISIRLYIQIVRFFTNLFGSFIINKFLISSKALCERMKQVYELSLEALKNENSXKM | 376 |
| 4  | LKIVATLNLQEEQTELLKSHNKNPFITRLYVQIVRFFGSILSNFMIIKRISTDPELQKELRIIYKISVEALSNEYVNKM  | 347 |
| 5  | LKILISNLKDEQKELLEGNEKKNPFTSRQYVQIIRLLGIMLSNFKIICWLDKRKPLQVMLKEIYKLSEALVNENSXKV   | 364 |
| 6  | ITDVCLPHLDWEQKLLGTTTKKDPFSSRIYIQIVRFFTILLSNQILVRRLSKRKTLIAKLSSTFYEYSIDTILSNNSXKV | 348 |
| 7  | IIEVCLPHLRTEQKLLGAGNKNPFSGSRIYIQIVRFLFGSLLAHYRVMRALTKLPSLKEQLGEVLELSKEALVHPNANKV | 346 |
| 8  | IIEICPHLQMTAQEKLLSSNEKNPFIRLYVQIVRFFATIMSSFIVKWLKRPDLVNKLKVIYRWTTGALRNENSXKI     | 352 |
| 9  | IIEICPHLQMTAQEKLLSSNEKNPFIRLYVQIVRFFATIMSSFIVKWLKRPDLVNKLKVIYRWTTGALRNENSXKI     | 352 |
| 10 | IIEVCLPHLQMTAQEKLLSSNEKNPFIRLYVQIVRFFATIMSSFIVKWLKRPDLVNKLKVIYRWTTGALRNENSXKI    | 352 |
| 11 | VVDTCLSHLEEEQEKLLSTNSKDPFVSRLYVQIVRFLNSILSNFKIWKWLTKRPDLVNKLKVIYRWTTGALRNENSXKI  | 344 |
| 12 | IVNVCLPHLKEEQKLLSTGKKNPFSTRLYVQIVRFFNFILSNFKLLKWLKRPDLVNKLKVIYRWTTGALRNENSXKI    | 344 |

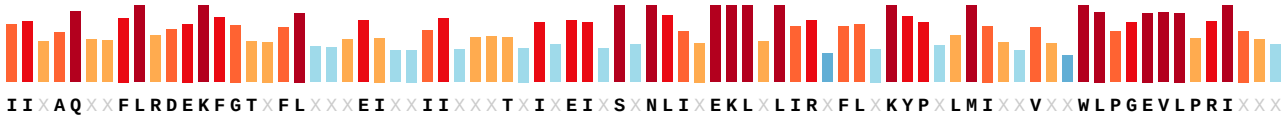

1 IITAQVSFLRDEKFGTFFLSNEEIKPIISTFTEIMEINSHNLIYEKLLLRGFLSKYPKLM IETVTSWLPGEVLPRIIIG 430  
 2 MITAQMIFLRQEKFGTSYLTENERNKLVNIITEVNEIDSYNLKYEKLLLIKALFGKYLKQMLQDVPKWLCGEVLARILVE 421  
 3 MLICQMTFLRDEKLSYISFTEDEGKHMIIQINQIRDIPSTNAICEKLMLIKQFLIKFPGPMISTIPEWLPTQVISKIVFS 456  
 4 MIISQLTFLRDEKFSRRYLPMSEITKMINVITQVKDMASTNLICEKLYLVKCFLDKFPVLMIDEIKVWLPGEVLPRIILLM 427  
 5 IISQLTFLKDEKFSYYLNKNEILRIIDTFTKIKDLKSTNLMNEKLLLMRCYINKFPKLMIPKISDWLPGELLISKIVLD 444  
 6 MIISHISFLKEEKFGSYLPSHTIDNLTISIVPNIKEVDSVNLSTEKLMLLRRFLEKYPDMMFNKASWLPGEVLLRILLD 428  
 7 IIGAQYTLLAYEKYGAYFLQKEDVMSIIRSVIRTKDIQSTNLICEKLLMRKFLSKYTSVMLEIPEWLPSEVLAQILSD 426  
 8 IITAQVSFLRDEKFGTFFLSDEEIKPIISTFTEIIEINSHNLIYEKLLLRGFLSKYPKLM IETVTSWLPGEVLPRIIIG 432  
 9 IITAQVSFLRDEKFGTFFLSDEEIKPIIDTFTTEIIEINSNLI>CEKLLLRGFLSKYPKLM IETVTSWLPGEVLPRIIIG 432  
 10 IITAQVSFLRDEKFGTFFLSNEEIKPIISTFTKIMEINSHNLIYEKLLLRGFLSKYPKLM IETVTSWLPGEVLPRIIIG 432  
 11 IVAAQVAVLGDVKFGTFFLNDDEELTSIIHTIPTIKETQSTNLICEKLLIKNLLAKYPRLM IENVSIWLCGEVLPRIILID 424  
 12 MVAQVAVLGDVSKFGSFFLNDDEITSLIRIIPSIKETQSTNLINEKLLIRSLIAKYPRLMIDQVSIWFCGEVLPRIILIE 424

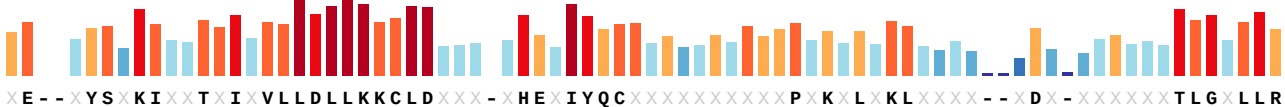

1 DE--IYSMKILITSIVVLELLKKCLDFVD-EHERIYQCIMLSPVCETIPEKFLSKLPLNS--YDS-ANLDKVTIGHLLT 504  
 2 TQ--TYANKLAVVALEILLDLLKQLLGGKDSVTASIIYESMEEKPAKDVLSPSMKMMLQSVL--PDT-YDFETITIGSMLR 496  
 3 ED--VYSTKTGFTAISVLELLKRCIDHSI-GHEYVFQCLHIDSTALYFGDSKDKKLQWSNNTLEQTYDINETHLAAAILR 533  
 4 EEENNHSAKIIVTAISIIILLDLLKKCLDVEK-GHKDIYQCVEIDKVKDVI>PRKFLSRIELSL---KEIEN>VGEKTLGTLIR 503  
 5 ED--MYAIKITHTSIAVLLDLLKKCLDVEE-GHQEIFKYVEVKT>LN>ESV>EGTLEKFNSTAVLNDLEIDINSMTLGQLLR 521  
 6 DG--SNGWKCI>AAISVLLDFLRLCLDHDN-TQINIYQ>SI>EVDKLNDVVP>Q>KFLPKMQQYL--KDK-SL>LESMTLGQVIR 502  
 7 EE--VH>SLSIL>QAGIAVLLDLLK>SLD>SSA-I>H>QTINRCIR>N>LAKDVM>PEGAQNR>SVHG-----H>SEW>SG>ST>LEEM>L>Q 498  
 8 DE--VYSMKILITSIVVLELLKKCLDFVE-EHERIYQCIM>V>SPITETIPEKFLSKLP>V>SS--HDT-AS>L>G>K>V>T>I>G>H>L>L>T 506  
 9 DE--VYSMKILITSIVVLELLKKCLDFVE-EHERIYQCV>V>SPV>TETIN>K>K>F>L>S>R>L>PL>NS--N>DA-G>D>L>N>K>I>T>I>G>H>L>L>T 506  
 10 DE--VYSMKILITSIVVLELLKKCLDFVD-EHERIYQCV>V>L>SPITETIPEKFLSKLPLNS--S>E>T>A>D>L>S>K>V>T>I>G>H>L>L>T 506  
 11 SE--I>NC>S>K>I>V>L>T>AV>ST>I>L>D>L>L>K>K>C>L>D>V>S>K-G>H>E>D>I>Y>N>S>V>Q>I>C>T>V>R>E>V>V>P>A>K>L>L>P>K>L>L>P>S>Q--N>D>P-E>S>I>S>Q>T>L>G>Q>L>L>R 498  
 12 NE--L>N>S>T>K>I>V>A>T>AV>ST>T>L>D>L>L>K>K>C>L>D>F>S>K-G>H>E>E>I>Y>R>C>V>E>V>L>F>V>K>D>V>V>P>K>K>L>L>T>K>L>T>P>S>Q--D>D>N>L>D>S>I>A>Q>T>T>L>G>Q>L>L>R 499

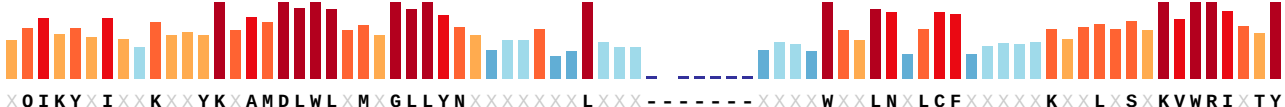

1 QQIKNYIVVKNDNKIAMDLWLSMTGLLYDSGKRYYDLTSE-----SNKVWFDLNNLCFINNHPKTRLM>SI>K>V>R>I>I>T>Y 577  
 2 DHLRNQITEQKAYIGIDLWLALV>G>IL>F>N>S>P>R>N>I>T>K>L>L>P>T-----D>D>R>G>D>S>W>L>S>L>N>E>L>A>F>K>T>N>D>E>K>A>M>L>L>A>L>K>S>W>R>V>V>I>Y 571  
 3 DHIDYLVNSKREYK>L>A>M>D>L>W>L>S>F>M>G>L>L>F>N>S>K>G>R>L>A>F>L>A>S>K-----E>G>E>K>W>V>D>I>N>L>N>C>L>S>V>N>D>P>K>C>R>I>L>S>L>K>V>R>I>L>I>Y 606  
 4 NQIKYLIL>V>K>K>E>Y>K>L>A>M>D>L>W>I>G>M>V>G>L>L>F>N>N>A>N>S>L>E>M>L>T>K>E>N>A>E>T>D>A>N>R>S>D>T>W>I>D>L>N>K>L>C>Y>N>K>G>T>G>K>V>K>Y>F>S>S>K>V>R>I>L>F>Y 583  
 5 NKIKYLVL>V>Q>D>Y>K>V>G>I>D>L>W>L>A>M>V>G>L>L>F>N>N>K>K>N>I>I>H>L>L>D>K>D-K>T>H>D>K>S>S>A>D>W>L>N>L>V>Q>L>C>F>K>N>S>D>G>K>T>K>L>L>S>L>K>V>R>I>L>T>Y 600  
 6 DHINYFLLANKHYKIAADLWLAM>V>G>L>L>Y>R>K>A>D>K>I>E>E>L>S>A>G>T-----Y>E>N>N>W>L>S>L>N>S>S>C>F>E>I>P>E>E>H>I>K>L>M>S>L>K>V>R>I>L>F>Y 576  
 7 KEITFLI>IS>K>K>E>I>K>F>A>M>D>L>W>L>A>M>G>L>L>Y>N>T>T>E>A>L>L>E>L>S>D>T-----D>E>R>G>W>L>R>L>N>H>I>C>F>L>S>G>N>S>S>A>K>F>I>A>L>K>A>W>R>I>I>T>Y 571  
 8 QQV>K>Y>I>V>H>K>H>D>N>K>I>A>M>D>L>W>L>S>I>T>G>L>L>Y>D>N>E>K>R>V>Y>D>L>T>L>E-----S>N>E>V>W>F>D>L>N>L>C>F>I>N>D>H>P>K>T>R>L>M>S>I>K>V>R>I>I>T>Y 579  
 9 EQIKYYIVVKNDNKIAMDLWLSMTGLLYDNGKTVYDLISE-----S>S>K>T>W>F>D>L>N>L>C>F>M>N>E>Q>P>K>T>R>L>M>S>I>K>V>R>I>I>T>Y 579  
 10 KQIKNYIVVKNDNKIAMDLWLSMTGLLYDNGKRYYDLTSD-----S>N>K>G>W>F>S>L>N>N>L>C>F>I>N>N>Q>P>K>T>R>L>M>S>I>K>V>R>I>I>T>Y 579  
 11 KQLKYLIL>V>K>Q>E>Y>K>L>A>M>D>L>W>L>A>M>T>G>L>L>Y>N>S>T>D>R>L>Q>Q>L>T>S>A-----T>D>R>E>W>L>D>L>N>F>L>C>F>Q>A>D>D>P>Q>A>K>L>L>A>I>K>V>R>I>L>T>Y 571  
 12 KQIRYLIVAKQEYK>L>A>M>D>L>W>L>A>L>T>G>L>L>Y>N>N>I>D>R>D>L>Y>L>S>T>H-----I>D>N>E>W>L>S>L>N>L>L>C>F>H>A>S>S>A>Q>A>K>L>L>S>I>K>V>R>V>L>T>Y 572

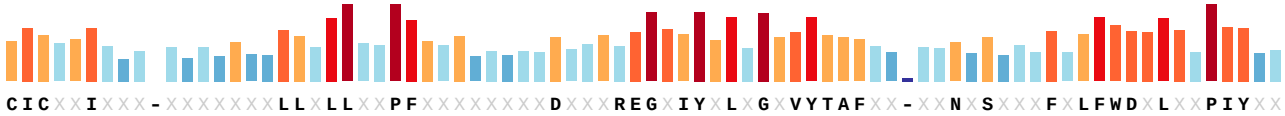

1 CICTKISQK-NQEGNKSLLSLLRTPFQMTLPYVNDPSAREGIYHLLGVVYTAFTS-NKNLSTDMFELFWDHLLITPIYED 655  
 2 LVSVNITSLESDEVQLQLLQLLLTPFDQLPNVLEKDCVREGLLYCLNGVVFCSVSMINSLGTQNAISLFWDNLLQPLFHK 651  
 3 CVTNNIDFL-GEKEAKKISQVLLNPVNVTVNKLEDNSTFMGVKYLNDFFFSTCGI-TNKCKPTTNIVLWGNFIIPMLAT 684  
 4 CVSKHLDEF-NETSKPMVLDLLKTPFDMSRPYINDSDVSKALLYCLRGLVYANLCGP-AQSSKESLSLFIISNLLKPIILIG 661  
 5 CICTHVTEL-DSAYQIPLLNILKIPLEISKTEHGNDNVRDGIYIYVTVGIIYTAFLLLQKNLSYETFQFFFDNLVKPIYEN 679  
 6 GVCSEISGK-FDEKDLLMLNLLRRPFELSEGQHTMPAVRDGLLYCLNGLTFTIVSTVNVNDAKRFGFFWDNLLKPLFIS 655  
 7 YSWAHVQGK-SLHHDHALIRLLKMPFEFSSTSHLEPDVCEGLIYYLTGMVVFVTCGN-SKAQEQTFRFFWENLISPIYHD 649  
 8 CICTKISLK-NQEGNKRLFSLLQTPFQMTLSHVNDPSAREGIYHLLGVVYTAFTS-NRNLSTDIFEHFWDHLLIAPIYEN 657  
 9 CICTKISLK-NEERNESLLSLLQTPFQMTLSHVNDPSAREGIYHFLGIVYTAFTS-NKNLSMDMFLFWDYLIAPIYEK 657  
 10 CICTKISLK-NQEGNKMLLSLLQTPFQMTLPYVNDPSTREGIYHLLGVVYTAFTS-NKNLSADMFLFWDHLLIAPIYED 657  
 11 SICSHLETFS-TENLRRIKLLQRPFTFSREDQYDFNIMEGLLFHLTGIIYTAFA-SATNLLSTAKFDLFWEHLVRPIYVE 648  
 12 SICTHLEHE-T-VKNIRIVNLLQRPFEFTQQEQYEFNVMGLIFHLTGIIYTAFA-SG-HSTISGEKFSLLWEHVVKPVYMR 649

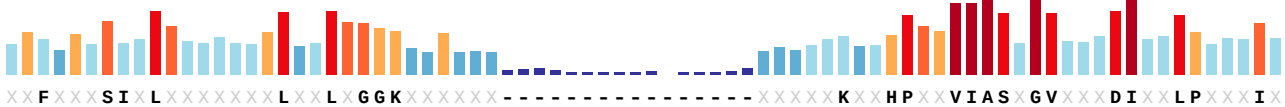

1 YVFKYDSIHLQNVLFVTLVHLLIGGKNADVAL-----ERKYKHHIHPMSVIASEGVKLDISSLPPQIIK 719  
 2 WNSAASSNELQTRTMDIFIKILRGKFPKTSTQRSNS-----PNTKQQQHFRPVRVIAARGIVISDIPNLSNNFIH 722  
 3 LLNYSANEDVKFELDTIYIGKLLTKAIQN-----QKNVDKTKSLHPKVIASEGVSVDDISALQLSPL 747  
 4 IILVNQH--LHHEVVSVLLRLLGKPLPETSPEK-----G-----NRNGLRPAPIKVIASGTGIATNDISKMTNHLIK 726  
 5 FIFNSP SFHVQTRLLGILLQLL GAPLFNLVSTSKHITSNAGKSKNIRNDK KVSPPNPKVIASVGISRDHIVPLPHTLSH 759  
 6 FLKTSPPNQLRARVIHLLALMMGGHGF DVVKKRRRPGDQEP-YTTKKQKVIRAYADPVRVVAATGISLDDITSLHPNVLN 734  
 7 FLFTSDSIKLSAAIKLLAVLDGKSETGTS-----KTSSFPKVIASVGVMTKEIEPVPADTV 710  
 8 YVFLYDSIQLQNILFTILHLLIGGKNDFAT-----ERRNKKHHIHPMSVIASEGVKVDISSIPSQIIK 721  
 9 FVFNYNSIQLQNVPLTVLHLLIGGKNSDVV-----ERKNKKHHISMSVIASEGVKIKDISSLPPSIIK 721  
 10 YVFKYDSIHLQNVLLTVLHLLIGGKNADVAL-----ERKNKKHHISMSVIASEGVKLDISSLPSQIIK 721  
 11 RILISQSIQLKARANALLRLLGGKITPEPQH-----KQVCKKIVHSIKIIASAGVTARDIQPLPLNVIK 712  
 12 KIFPSTSIQLRNRAIVLLRLLGSKVMEQQANQQHQEKQQ-P-HTHRNIKNGAHPIRVIASAGVSARDIQPLSANVIG 727

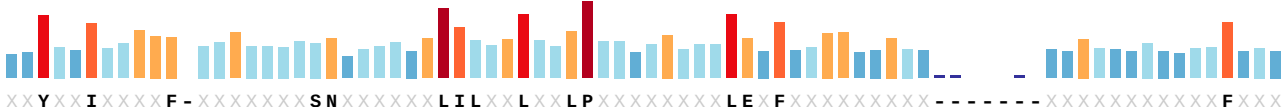

1 REYDKIMKVVV-QAVEVAISNVNLAHDLILTSLKHLPEDRKDQTHLESFSSILIKVTQ-----NPKDTPIFRDFFGAV 791  
 2 IWYMQMAKSAS-DLLRTRSFEDHAKSLFLSLIDTVPESSLNDEVFDYFLLVLKHYLEP-----TYDYTFNQLSVLTLF 795  
 3 YLLETLSGVILLYVLNKSQNHSTQTRMLILEYLEEQIPNNQITLSTLCRCISMFYEYYN-----SIDFIANSRSLISD 820  
 4 QLYYPLSDLIF-SILRKHILKPPSSELLISLLNNTPLELKTVSYLEEVNQVMIDILKT-----SDDHTEISLLFQTY 798  
 5 PGYTLISRLFL-NSLPINAKFLT VKTEIILDLIAQIPDELKTEEVFQEYRNIVVSLTKLYKTSYTTKNKNDVLFECFSRC 838  
 6 ENYLSIMGLCM-DNTGAHPLS-YLTDKLLYLLSKLPEHLRNTEVLEAFSDVLSFVFNRS---V-RISSKANTVRIFSTH 808  
 7 DAYELVLTLS-NALSIDSSEWATRFELFDSMLRLLPAEFIDDTHTLITFLDLVSRLFS-----QASLPKDPSTVLCPL 782  
 8 YAYDKIMKVVV-KAVEVAMSNVNLAHDLILTSLKQLPEDKQDQNHLEAFRTILKVA-----NNKDKPIFRDFFVT 793  
 9 SAYDKIMKVVV-QGVKTAMSNVNLAHDLILTSLKHLPEDRKDQSHLEAFSSILIEVAE-----NNKDKPIFRDFFGAV 793  
 10 SAYDKIMKVVV-QAVEAAISNVNLAHDLILTSLKHLPEDKQDQIHLEAFSSILIKVAQ-----NNKDKPIFRDFYGA 793  
 11 SSYEAIKDLVF-QAIESDSSNLCQNFDLITALLKVLPNKFIDKEHLREFTNAIFGVAI-----QRKEDQNLADVFIQI 784  
 12 TNFETIKDLIF-EAIRSNSSNLSQNSELITALLKQMPKSFVNENSLEDFAEIIREISI-----QRKDDKNVGSHFVQL 799

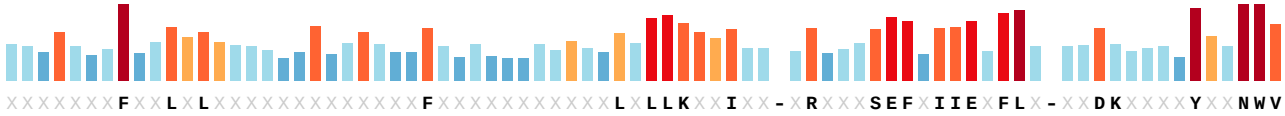

1 TSSFVYTFDLDFLRKNDSSLVNFNFIQISKVGISQGNMMLDQLLDKDVIRK-ARNETSEFLIIEKFLE-LDDKKTEVYAQNWW 869  
 2 ATQLVTKFEKLLLEPSNSGLSSVIALYDSKTFINYDFPLKLMISMLDS-NDCDASLFAIFSKFMD-MKNKNYPDYVTNWL 873  
 3 MSRVCIKFKDIIFDDNYNVFRNFILSFLMLFQEEHHVDNLLQELIQNALQANISELKLIEGILS-LKKTDCDLFAINWV 899  
 4 THVVVTIFPNLLLNKETNYLEDYLKLFEPFVGWGVKEMLLDVLKDFLRE-KKLAGWEFYMMGIFLK-TKDTLSHLYVENWI 876  
 5 TCLLGKTFPNIILNPKRDIFSKYLASFNDLFTDNADMLIKLLKDIKY-TRPQISELTVIELFLTNTNDKNSRDYIQNWV 917  
 6 SSKLAITFKDILFDKNSKAFTNYIAKFNMLSDREGTCLLTFLLKQLLNN-SKGIIPELFFVVENFLL-IGNKEVDSYLSNWV 886  
 7 VLSLTGPFANFVFESSK-NFQKLLKGVDFHYGQDSEIRLTLMKFEFSKK-LRRQISEFTIIEERFLE-VGDLSCQRYASNWI 859  
 8 SSSFVYAFLELFLKHKHSSSLVFEFSIQLSKVGIPQGNMMLDQLLDKDVIRK-ARNETSEFVIEKFLE-LNDKKTEVYAQNWW 871  
 9 GSSFVYAFLELFLKHKHSSSLVFEFSIQLSKVGIPQGNMMLDQLLDKDVIRK-ARNETSEFVIEKFLE-LNDKKTEVYAQNWW 871  
 10 IPSPVYAFDLDFLRKHSSSLVFEFSIQLSKVGIPQGNMMLDQLLDKDVIRK-ARNETSEFLIIEKFLE-LDDKKTEVYAQNWW 871  
 11 TCCLATQFATLFSDERK-IFEEYLGKFSFILLANGETKIKLLKELIVG-LRGKMSSEFFIEAFLQ-QGDLSTKEYVSNWI 861  
 12 TCCLMSQFATLFSDERK-IFEEYLGKFSFILLANGETKIKLLKELIVG-LRGKMSSEFFIEAFLQ-QGDLSTKEYVSNWI 876

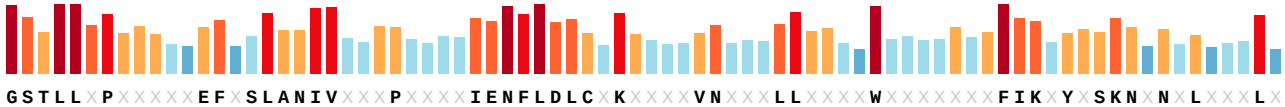

1 GSTLLPPNISFREFQSLANIVNKPVNENSIENFLDLCCLKLSFPVNLFTLLHVSMWSNNNFYFIQSYVSKNENKLNVDLI 949  
 2 SVAVLPSNMNRHDMKFLMNIISKNPVLSIENLLTVIADIDREFYGMICTSALTWDDHALLYFIKGVFTSNAPNSCNYL- 952  
 3 GKKLLSPSVQEGDFILYSRIVAKISEKQTIIVNFDLADKLGFEVNPTEILRISFWKPSGLVIFLEEYIAKHHVDFADIVS 979  
 4 GSTLLSPTMSYTSFLDLANIINQITTDQVMENFLDLCCKMSLSINYPQLLNKQYNDKNSLFFIKTYLSKNSNALDNMS 956  
 5 GSTLLSPMLTYPEFQSLTNIVNMIPSSQIVENYLDLCVKTSLAQNPCTTLNIRNWKDKQLIFFIKTYISKCSNRLDDDIL 997  
 6 GSTLFPPSLSKDEIIALAHCVSTIHTEKAIENFIDYSKKIE-QLDVVTLHLGAWDESDFCFFVKAYLAKRKNVSVTHLI 965  
 7 GSVLLPNTLTTSELHFSFASIVKLLSPQATGALLNFCILNSKDKPDICELLNIDDWGDEKVAILVKAVVSLSSNKLVPSLA 939  
 8 GSTLLPPNISFKEFQSLANIVDKVPNENSIENFLDLCCLKLSFPVNFFTLLHVSKWSNNNFYFIQRFFSKNDEKLNADLI 951  
 9 GSTLLAPNISFKEFQSLAGIVDQVPNEHSIENFLDLCCLKLTFFPVNLFALIHVSKWSNDFYFIQSYVSKNENKLDLTDLV 951  
 10 GSTLLPPNISFREFQSLANIVDKVPNENSIENFLDLCCLKLSFPVNLFTLLHVSKWSNNNFYFIQSYVSKNENRLNADLI 951  
 11 GSMLLSPMPHEHFSTLVNIVTLIPTTEVLENFLNLSKSVNYDVLFSLLNIQNWFEFGIIFIKNSILKNHNTIKPELN 941  
 12 GSMLLSPMPHEHFCSLVRIVNAVPTTEVLQNFNLTSKVPFEVDLPHLLNLSKSWDDKELTLFLKNSIINKLKNRPELY 956

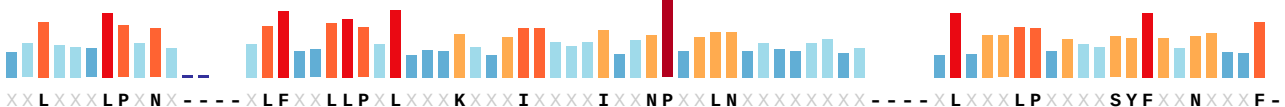

1 TLLKTSLPGNP----ELFSGLLPFLRRNKFMIDILEYCIHNSPNLLNSIPDLNSD----LLLKLLPRSRASYFAANIKLF- 1020  
 2 ---SGCLPTRISKSLFLFKAILNSPELFEKENGIVLRSVLKNPSLIQNLNVAEVT----KLRDLSHDHAPTDFEMKYIN--- 1022  
 3 SIIDADRLNNV----ELFSYVLKHLPENQKSAFIKQHYTKCPLIWNQGVLIIDDY----DLIDITLDCEICTFIAHHFSFL 1051  
 4 QFLIEILSENRTS--SVPRILLPLLIDIKRYDIKTSIEQRPLILSIVSDPILL----HLKDILPTSKMSYLIINIIGLF- 1029  
 5 VLLHDVLPDNI----DVFDSMVPLLIQINRTDLIRHCIEKKPSYLNTPAIMNYH----DLSEILPDDRKYLLNLLKDF- 1068  
 6 ALLQKLLPSRP----ETFTELLPTLLEYGHKELVSDCVKKNPIILIESLLPKYPD----NLSDFFSADEILAFVPMKNF- 1036  
 7 VKLQMLPSRV----SLFNELFTTLQTLKYEELIRHVIIANPEAANGIILLNGTQAPAVLPKGLPRDTLSYFVQSPLNF- 1014  
 8 TLLKTSLPGNP----ELFFGLVPLRLLNKFIDILKYCICSNPALLNSITDLNSD----FLMQLLPLSRASYFAANIQLF- 1022  
 9 TLLKTSLPGNT----ELFVGLLPFLKEKKFMSILEYCIQSNPTLLSYISDLNSD----LLELLPRSRTSYFVTNIQSF- 1022  
 10 TLLKTSLPGNP----ELFFGLLPFLRNNNFIDILEYCIQSNPTLLNSIPDLNSD----FLIKLLPRSRASYFAANMKLF- 1022  
 11 LFLQSVLPNST----PIFSEMLPFLCGAKHYNIYRYTLTKSPKFLNLTTSVDK----SFDEILPLEILPFLQSIQSDY- 1012  
 12 SFLENILRENE----QLFSTLLPFLCQLGHYEVLRVLVLRTPFLSHTLGVDEE----SFDQILPLEKLSFFLKNLLNY- 1027

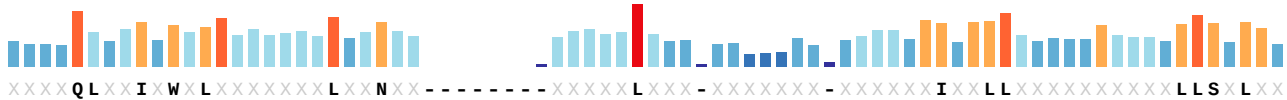

1 KCSEQLTLVLRWLLKGGQLEQLNQNFSEIENVLQNA-SD---SE-LEKSEIIRELLHLLAMANPIEPLFSGLLN 1087  
 2 -----VVYKQIAGTMNNKLSQSGTSTDKSNSECFNEPQLDNQGGTGEDTSVVVLEKLEHCCSNKGDALTEILS 1092  
 3 STSSKAKLLIIFIEKDMYDLLVQFRY-----NLIQEFLLPTLTIIYKGD---DIITTVQQHLINYCFAKNSFVLLDCIEP 1121  
 4 PQLIQYGIQWVLEKDETALLSNYA-----TIEITILFVD-KPTDTSVNEERKKLIQHILHYLFENRRWVLLSNLID 1100  
 5 SAIVQYKIMWVAKTDEFTLFKKNYV-----KIESCLFLD-EPCSENILD-KKAFIKELFTIFYEKQAWQLVAIILVV 1138  
 6 SSETQVILLKEAWKSGLSTVVKNF-----SVASCLFEQ-ALDG-SISNVRKILTDSILSSIKDERWDLNFFV 1106  
 7 DENAQLGMIKWILDMNEADLLFADRG-----EWKDCVFLR-IGKDGFEFSNEFKILTADAISQLYEKQSWKNLSKCIL 1085  
 8 MNSEQLTIIRWLLKGGQLLEEINQNFSEFKSSLQNA-SG---HE-LEKSEIIRELLLLTAKNPIEPLLGGLLE 1089  
 9 NHAELTIICWLLLEGEELDQINQNFPEVKNILLHT-PA---DE-LEKSKIIGELFRLATKNPIEPLFSELLN 1089  
 10 KSSEQLTLIRWLLKGGQLDQLNQNFSEIESVLQNA-PD---SE-LEKSEIIGELLCLTTRNPIEPLFSGLLY 1089  
 11 QDTIQLRILQWCIEHNNINMLFGHYE-----TLEHYLFKK-EYGTES-SRRNQLLLDLLSSLLVGGKWLKYSKIIQ 1082  
 12 ETFFQLRTIRWALKHNNINILFENSS-----VLQKCLFQQ-CTSS EDT-MKKEKLLLDLLSVTVLGEKWHYLSLLVI 1097

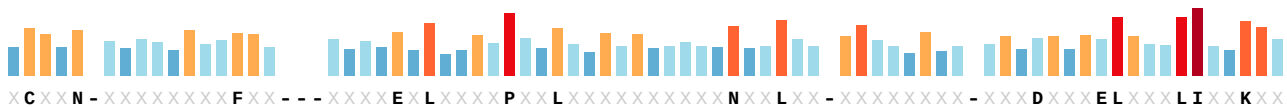

1 FCIKN-NMADHLDEFCEG---NMTSEVLFKISPELLLKLTYKEKPNGLLA-AVIEKIEN-GDDDYILELLEKIIIQKEI 1161  
 2 NLLSQ-DQTTIISNFFCSYAAQNIIEVIKLISPKLLRHLCKFYDPHLHALILPAINYLFQVQKISTLTSLAILLIEKDKDI 1171  
 3 STLTSTRLEDVIKLE---KSYEDNITFVPAKYIIFIDNLPMDTKINTTE-ILRVYLVTDGVTQCLFFLTSLINDKMM 1195  
 4 SCLSN-SQTDYIISLFS---GGNATELQNILPQTLANMINRCGSLNPSLID-TLKQNYSL-QKADYIITLISELVECGKT 1174  
 5 SCINH-GYESNATEFLA---NIDSNTLNSFPPKAIATIVNRCGSMNPKLL-ILHQFFSN-KEKFFLELVSELSLKKI 1212  
 6 TAYLNGRDTGLDNFFFT---KVDSESLHFQPNFLVAICDRLGY-SERRKN-VLKKCFV-KEKEYVISLIEALIKSKKF 1180  
 7 YCMTC-GQVPCVEQVYV---RMRDKRRENNSPK--SPKADECKSLNSILSE-SIKEIYQG-DAIDTAFEVTTSLIELKVV 1157  
 8 ICVEN-SIIDCLNEFCE---AITDELILLKINAELMIRLLTYRDNPNALLT-AVTERIRN-ADSDYTFEFIGKIVARKEI 1163  
 9 FCIDN-SMTNNLDEFCE---TINDEILSKINPELLMRLTYRDKPNVTLT-VLAGNIGN-ADSDYKFELLERIARKEL 1163  
 10 FCLKN-SMTDHLDEFCE---KVTDEVLLKINPELLLKLTYNDKPNGLLT-AVTEKIGN-ADNDYILELLEKIIAQKEI 1163  
 11 SCMKNGQASPVTKTFS---KNDPESLFWLTPVTLASMINKCGLLNPSLIE-VLKKCFSR-KPADFNIELTKELINRNES 1156  
 12 WGMEN-NEIGHLTTTCFS---KENLTPLIHLSPQALALMINKCGSLNPTLIE-AVKRSFFT-NDTQFNIGLIEELIVHNKF 1171

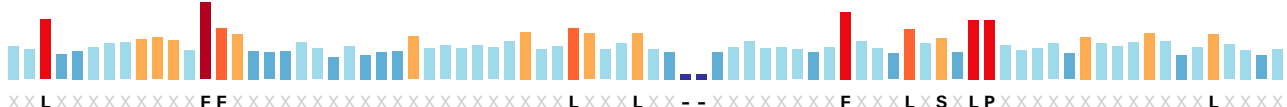

1 QILEKLKEPLLFFLNPVSS-NMQKHKKSTNMLRELVLVLLYLTKPLSRSAAKKFFSMLISILPPNPNYQTIDMVNLLIDLI 1240  
 2 NGLDRIIDPFSIFLFGKPKKSSDIKHKIAGLFLKMFLLKE--ERGVHLSIVLHRIVRSLPRRRPEYLKKNVINTISTQK 1249  
 3 VPLTRCRNEVDFDFIALDSSNDLSIKAKAVTTFESLINVIFL--LRKKVDIGFLSQYIARLPERPSRYLVLDSEKLIINLK 1273  
 4 QALILSKQDMLLFIIDSENAALRPVDQRRILELMPRFIQSLQN--KSEKTFIDFLKMLFNLLPEHSNQYLLNLVQLFKESL 1252  
 5 DALLSVSSELINFFIDDQHFTEDEQGSIGILEKFLAQLQK--YNERTSFNFTKDLMSLPSKSKTKYLSKLASCVGSQAQ 1290  
 6 DVLNDLRSEFIFLLVHVKDPSLTFEKQYVDGINNFILLKE--QSEDVVVDFMVYLSIPMQKQMSINDKTVLKYMISDE 1258  
 7 QNFSSCREEFLLNFIRASNFVSVEQAIALELFERFIAVLM--CFDEIILSFVESILSSILKVLTDHSLQVFGLLNHHL 1235  
 8 LLEKLKEPLLVLVSPVRS-SEQKYEESANMLRELVLVLLYLTKPLTRSAAKKFFSMLVLSILPSNPNHQITDMVYLLIDLI 1242  
 9 LVLEKLKESFFIFLLDPVSRNKENHDNGTKIFCELILLYLTKPLSRGAAKKFFSMLVSTLPERPDRQSIDLVHLLIDII 1243  
 10 QLEKLKEPLLFFLNPVRS-NKQKHEKSANMLRELVLVLLYLTKPLSRSAAKKFFSMLISILPPNPNRQTIDMVALLIDLI 1242  
 11 QVFFLCGKEVVAFFTVRSKMFTLSEQDAISALFEMMTSLMC--QKDSLILDFVQELYANIPQECDSHLLKILIIAVKKL 1234  
 12 QLFILCGKEIVTFFLDNSSLSGVEQDGVLSIFEKLLVSLMG--QKKSLLVDFVEEISEKLEAPDAYLLKIITILVEQL 1249



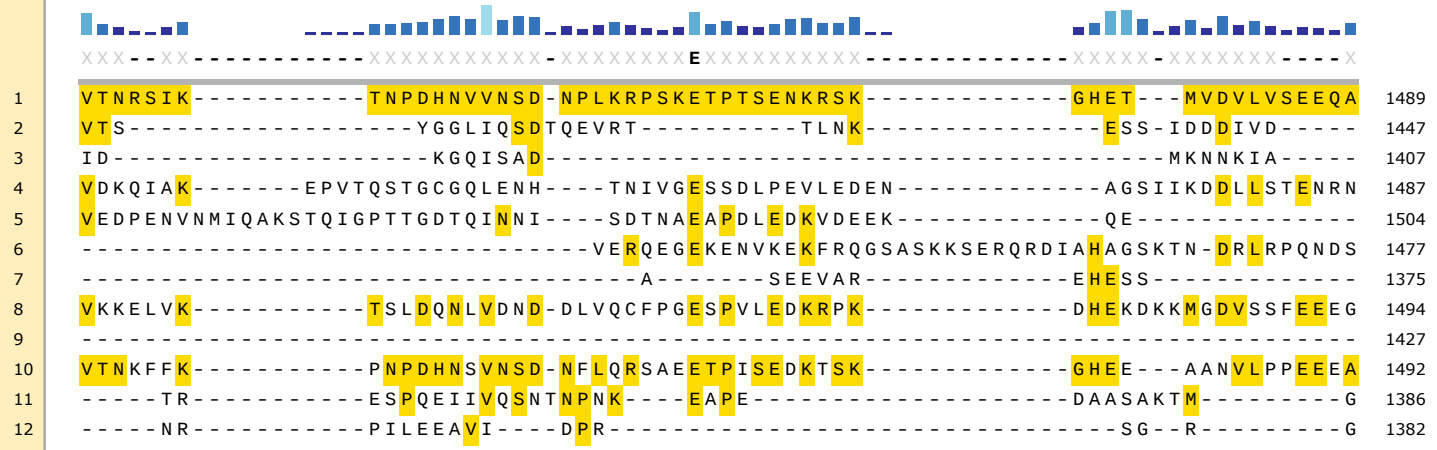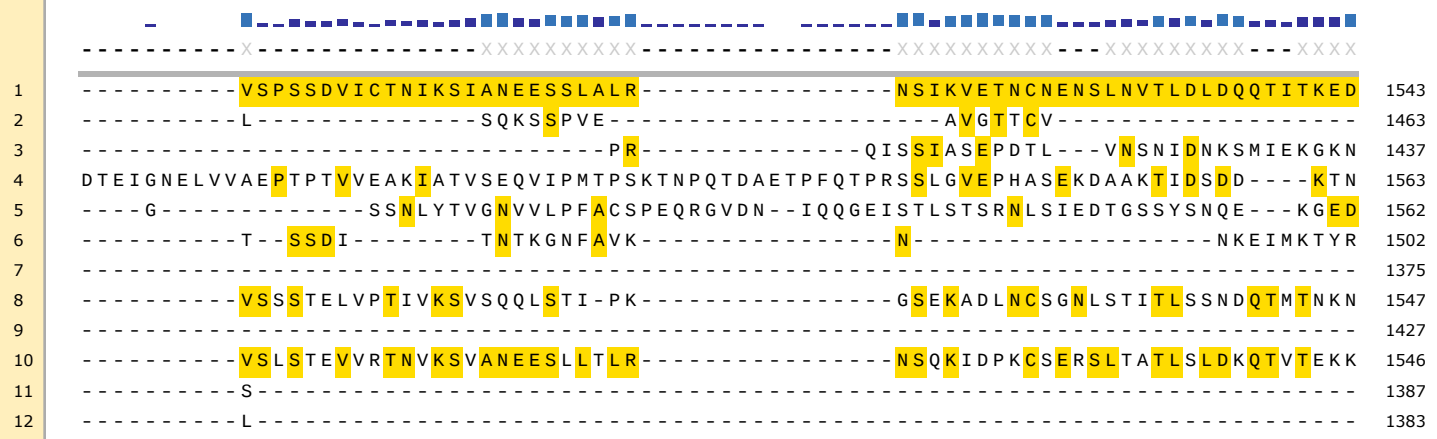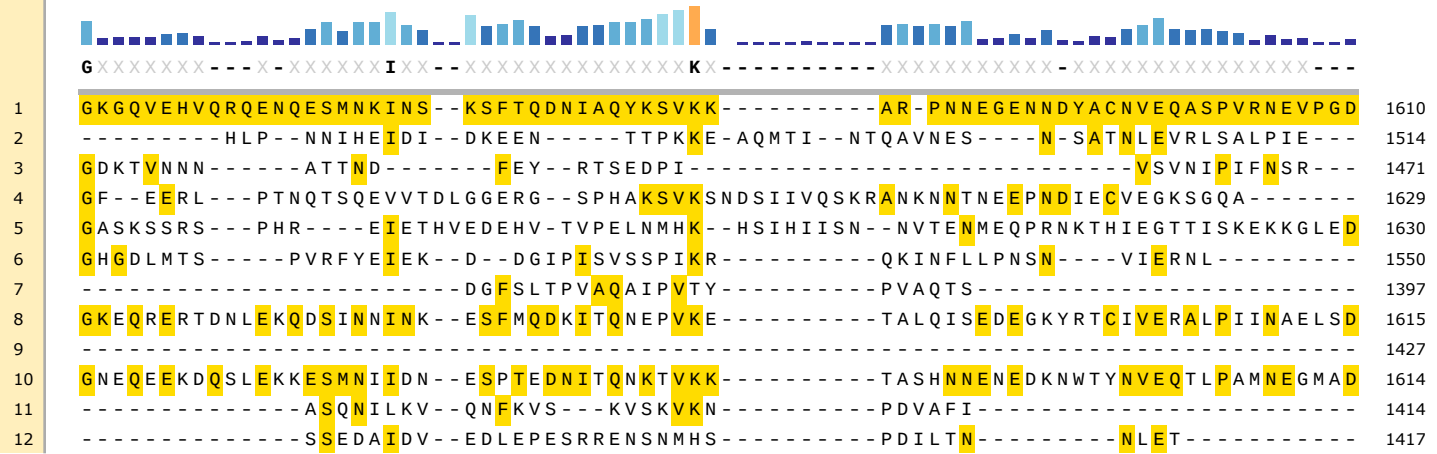



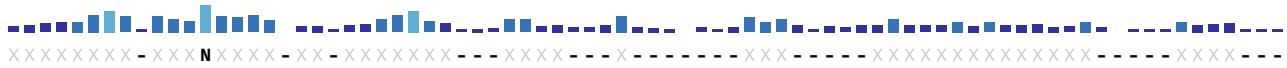

XXXXXXXX-XXXNXXXX-XX-XXXXXXXX-XXXX-X-XXX-XXXXXXXXXXXXXXXXX-XXXX

|    |                                                                                  |      |
|----|----------------------------------------------------------------------------------|------|
| 1  | GIQIPSGT-ILLNSSKQ-TEKSKVDDLRSDEDEHGTVAQEKH-QVGAINSRNKNNDRMDSTPIQGTEEE---SREV---  | 1680 |
| 2  | ---TGTQMIDNSNKY---KG---SEMVTGSDLRAEGKVS---                                       | 1544 |
| 3  | ---VSGLD---                                                                      | 1477 |
| 4  | ---T---G---QSFKANPSKSSAD---SDKPTNLDTK                                            | 1654 |
| 5  | MTENS SI---G---EAKLALPMATIVDDPQRSSTNV DTE                                        | 1663 |
| 6  | --KATQETEISNNGNATDIVPIEVNGDHMDNDGAVSLAGNAT-GGGKNN---NVVIEAVTPNSES DR---GRHV---   | 1615 |
| 7  | ---VEE-ITTNKHKD---A---QDPG---                                                    | 1413 |
| 8  | GLQNSSGI-MLVNLGLKQ-KEGSKVDTLNHGEDEKVTFAEEDP-QMISVNSSEENAQSIDSVPMQNAVKG---SVEA--- | 1685 |
| 9  | ---                                                                              | 1427 |
| 10 | GIHTSSSEA-IFLNNSKQ-TEKSKADALHYNDEDEHGMATGENR-QSDEINSVQNAKKIDSIQIQSVEEE---SRKA--- | 1684 |
| 11 | SSTSCPKT-PFTTGS SK-NV-TEINDAV---LE---STRSLERGDD---                               | 1451 |
| 12 | QISSNGKG-SFLNGGK-AL-LPYDAVR---DA---RNRDINENEEH---                                | 1455 |

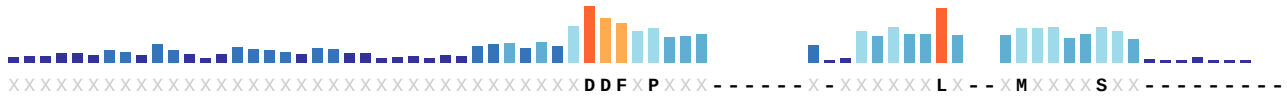

XXXXXXXXXXXXXXXXXXXXXXXXXXXXXXXXXXXXXXXXXXXXXXXXXXXXDDFPXXX---X-XXXXX LX---MXXXXSXX

|    |                                                                                |      |
|----|--------------------------------------------------------------------------------|------|
| 1  | VMTEEGINVRLEDSGTCCELNKNLKGPLKGD DANINDDFVPVEE---N-VRDEGFLK---SMEHAVSKE---      | 1742 |
| 2  | ---KTDRSGSII---TRNSNVNH---RPGPE---NSSGLLTLAIYKSTASR---                         | 1583 |
| 3  | ---LNNQKISDEYVSSHDL ELARNGLQNQAQLH---DMHEGYKKKSANLLTQ---                       | 1524 |
| 4  | EMEE DNLSRNE LR TALDEKETKSRTYIEGEEKGEDDFAPVNT---A---QQDPFLE---AMEKEVSQTEVIL--- | 1719 |
| 5  | ERENSTTSKSSH LIGAL---EEQATQDDFVLVEE---P---PKDTLLD---ELDKEISQDMTET---           | 1716 |
| 6  | RISSDSITNKV---SRNDDFVPESTRNSSDNDDFVPIEA---A---IEEDNFIE---EMEKEAIRN---          | 1670 |
| 7  | ---QKKGANIDKKKEATVESNDDFAPAET---D---QDDEFLL---AMEQKLETTSNKLAPIIG               | 1465 |
| 8  | ITTEETLTVHLR DSETFNKMMERQQRKGGKINTDDFAPVDE---N-DRNEGFL E---AMEQVASRE---        | 1747 |
| 9  | ---                                                                            | 1427 |
| 10 | VTIEESLSERLEGC GTLEPIKNLEGGQ LKEDK KANINDDFVPVEE---D-GRDEGFLK---AMEQVASKE---   | 1746 |
| 11 | ---F---APVNVAP---KDDFLE---EME EKIK---IKNQKSSSEQ---                             | 1481 |
| 12 | ---VFSRI---LGATEFR TFP---KDEARETKE---VREEKTDNLE---ERPQTVKDD---                 | 1498 |

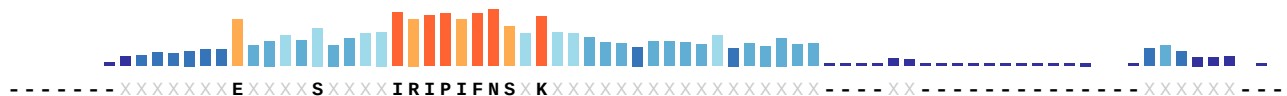

XXXXXXXXXEXXSXXXXIRIPIFNSKXXXXXXXXXXXXXXXXXXXXXXXXXX

|    |                                                                                 |      |
|----|---------------------------------------------------------------------------------|------|
| 1  | ---TG-LEEQPEVADISVLP EIRIPIFNSLKMGGSKSQIKEK LKRLQ---RNELMP---                   | 1792 |
| 2  | ---EAPNTQFAPEVHF---GPKKVEPVTSVVKMIK---RDQGSMGDIV---Q---E---                     | 1623 |
| 3  | ---HNMRPPFE DVAIP THKELKIPIFNSLILKSTNQPPMIPNSQRKV---                            | 1574 |
| 4  | ---KSSPIAKNKRPTSSMHEINIPIFNTLKLTDPSWKERSRTQQESTTRMGQQKIDSSQVTST---RS---D---     | 1783 |
| 5  | ---NASTAHKD VVLDSPMPAIRIPIFNTLKI GSGRIEKKKHTKIDKA---LNKRLNLDSSAILH---QQE DAPCDV | 1784 |
| 6  | ---LERPAKHHP S IRIPLFN VSRPSGRENTKQQKDNHTGT---AISTFSDVGVKINEGNFN TIED---        | 1730 |
| 7  | QNPPEQNKLQSVSLDDVDAPASSKIRFPIFNSSKFQGRSVKVLNNTTNLTQ---NA---K---                 | 1519 |
| 8  | ---TSLLKEQTE LADTSVLP EIRIPIFNSLKIQESNGQIKQKLMRLQ---                            | 1798 |
| 9  | ---                                                                             | 1427 |
| 10 | ---TSLLKEQPEVADISVLP EIRIPIFNSLKIQESK SQIKEK LKRLQ---RNELMP---                  | 1797 |
| 11 | ---IEGIEANHNDVSQMSQIRIPIFNSSKLQNKLDLEGPRCDKGE---                                | 1523 |
| 12 | ---DAMASVENKDES QV LGIRIPIFNSSKLQNKPKSKDSVHENDLS---ER---KRKRVDG---              | 1550 |

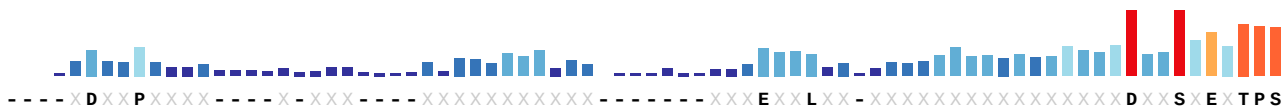

---XDXXPXXXX---X-XXX---XXXXXXXXXXXXX---XXXEXLXX-XXXXXXXXXXXXXXXXXXXXDXSXETPS

|    |                                                                              |      |
|----|------------------------------------------------------------------------------|------|
| 1  | PDSPPRMTENTNINAQNGLDTVPKTIGGKE-KH-----HEIQLGQAHTADGEP LLGGDGNEDATSREATPS     | 1858 |
| 2  | EKD VNTAFEP---FQQDAAIKV-----ALKDDEMSCEIQ-----VSENE NCADD TSSKEGTPS           | 1674 |
| 3  | -----R-KR-----PLGNPSTQGGY-----TDIENERVRDYD DSQSLEDSAD                        | 1610 |
| 4  | KQDVIP-----SHLEVDLHS--SFPYGTPTGNGIDDMDINSRETTPS                              | 1823 |
| 5  | PIITKDHLPEEIDTVT-KQAPAFGNIPVNNMAEE-----VPLENDLQS--SFVIDG---KEDGGT SRDTTPS    | 1846 |
| 6  | ---KKNP SFNESTEVL--AG---KTNSKGM EARKDEFKDDIEDDEIE---SSSEDRMQDDEEYRDEASSASTQS | 1795 |
| 7  | -----NADEKEPDN-----NARSNGQTL EESRCSEDAVSRDATPS                               | 1554 |
| 8  | PDSPPRVASNANTMNVLN---DSTSVGKEGKY---DEIQLAQSHIEKDGDP LLVGE GNE DATSREATPS     | 1861 |
| 9  | -----                                                                        | 1427 |
| 10 | PDSPPRLAANTNIIGRNGLGTAPKAIGGKEEKH-----GEIQLAQAHTADADPSLVGDGNEDATSREATPS      | 1864 |
| 11 | ---ESPREPR-----D-SSVGKACDK---DAKNSQAIDLES-SQEDNESNILDNMSKEDY-SKEPTPI         | 1577 |
| 12 | ---NDEEGNDYD-----E-HEVETAREV---DPISTQPEDLAS-S-PDNESTFLQDSRRSDWASQNSAPS       | 1606 |

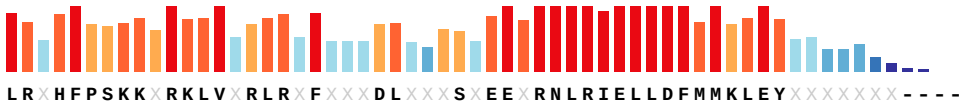

LRXHFPSKKX RKLVRRLXFLXXXDLXXXSXEERNLRIELLD FMMKLEYXXXXXXXXX---

|    |                                                                  |      |
|----|------------------------------------------------------------------|------|
| 1  | LKVHFFS KKSRRLLVARLRGFTPGDLNGISVEERRNLRIELLD FMMRLEYYSNRDNDMN--- | 1916 |
| 2  | LHIHFPS K KARKIVNRLRDFKPDQLAALSAAERRNLRVELLD FMMKMEYFEAEE-----   | 1728 |
| 3  | IRLHFPNKRARRIVSKLRGFSEYDMGQLS AEEKRNLRIELLD FLMKIEYHTITD-----    | 1664 |
| 4  | LRMFFPSRKTRRLVSR LRNFDPSELSTLPTEERRNLRIELLD FLMKLEY YTGDDADKREI  | 1883 |
| 5  | LRMHFPCRKSRKLVNRLRRTFNPD ELASLPVEERRNLRIELLD FMMKLEY YTGDKNN---  | 1902 |
| 6  | LRDHFPSQ NARKLVRYINELGHEELLQFLPEEKRNLRIELLD FLMKLEHYS DK-----    | 1848 |
| 7  | LRMHFPSK KARKLVNRRVRAFTAEDLSHLPPEEKRNLRIELLD FLM SLEHEHGFYQ----- | 1609 |
| 8  | LKIHFSSKKS RKLVSRLRGFTPGDLNGISVEERRNLRIELLD FMMRLEYYSNRDDDMV--   | 1919 |
| 9  | -----                                                            | 1427 |
| 10 | LKAHFSSKKSRRLLVGR LRGFTPGDLNGISVEERRNLRIELLD FMMRLEYYSNRDNDMG--  | 1922 |
| 11 | LRLHFPSK KARKLVSR LRGFTVEDVSDISPEEKRNLRIELLD FMMKLEHESLNGEF----  | 1633 |
| 12 | LRLHFPT RKS RKLVS KLRGFSLDDISRISLEEKRNLRIELLD FMMKLEHESLAEEL---- | 1662 |

**Consensus Threshold:** >50%

**Compare to:** *Saccharomyces\_cerevisiae*

Amino acids that match the reference are marked with orange highlighting.

**Created:** Aug 10, 2020

**Last Modified:** Aug 10, 2020
